# Supplementary material for: The INSIEME seismic network: a research infrastructure for studying induced seismicity in the High Agri Valley (southern Italy)
Source: Copernicus journal article supplement (doi:10.5194/essd-12-519-2020), 2020-03-04
Supplement: Supplementary file 1 [file essd-12-519-2020-supplement.zip]

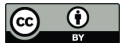

## *Supplement of*

# **The INSIEME seismic network: a research infrastructure for studying induced seismicity in the High Agri Valley (southern Italy)**

**Tony Alfredo Stabile et al.**

*Correspondence to:* Tony Alfredo Stabile ([tony.stabile@imaa.cnr.it](mailto:tony.stabile@imaa.cnr.it))

- [essd-12-519-2020-supplement-title-page.pdf](#)
- [essd-2019-113-supplement](#)
  - [INSIEME-network.kmz](#)
  - [essd-2019-113-supplement.pdf](#)

The copyright of individual parts of the supplement might differ from the CC BY 4.0 License.
